# Supplementary material for: Network Structure and Influencing Factors of Tourist Flow in the Yangtze River Economic Belt: A Study Based on Travelogues
Source: Research Square preprint supplement (doi:10.21203/rs.3.rs-6315958/v1), 2025-06-16
Supplement: Supplementary file 2 [file 425c7bed11bd9ffd71c4f052.xlsx]

## Sheet: Sheet1
city	Degree centrality		Close to centrality		Intermediary centrality
	out	in	out	in
Aba	15	16	7.9	8.85	32.66
Anqing	12	10	8.15	8.8	29.43
Anshun	110	63	8.29	8.94	248.44
Bazhong	5	3	7.64	8.65	4.36
Bengbu	2	1	7.51	7.94	7.92
Baoshan	21	15	8.24	8.45	132.6
Bijie	23	25	7.86	8.67	25.17
Bozhou	5	7	7.61	8.24	28.45
Changde	8	5	7.94	8.49	6.18
Changzhou	39	35	8.25	8.9	13
Chenzhou	2	4	7.6	8.43	0
Chengdu	83	208	8.38	9.27	1567.75
Chizhou	22	24	8.18	8.87	69.43
Chuzhou	9	7	7.89	8.47	111.07
Chuxiong	11	6	7.9	8.41	1.56
Dazhou	1	2	7.58	8.61	3.03
Dali	108	76	8.28	9	425.74
Dehong	14	7	7.93	8.45	28.88
Deyang	6	10	7.81	8.68	6.48
Diqing	32	30	8.22	8.5	114.27
Ezhou	0	0	0.79	0.79	0
Enshi	36	27	8.04	8.98	56.39
Fuzhou	8	8	8.04	8.79	7.77
Fuyang	3	5	7.67	8.54	156.83
Garze (Ganzi)	31	24	8.07	8.93	144.21
Ganzhou	5	3	7.88	8.61	14.04
Guang'an	0	0	0.79	0.79	0
Guangyuan	12	7	7.96	8.6	4.1
Guiyang	99	142	8.28	9.11	241.41
Hangzhou	251	386	8.5	9.27	856.51
Hefei	50	72	8.32	9.15	661.31
Hengyang	12	19	8.03	8.86	32.05
Honghe	11	15	7.96	8.57	68
Huzhou	71	45	8.21	8.92	9.8
Huaihua	23	17	8.16	8.53	121.41
Huaian	4	5	8	8.64	49.45
Huaibei	4	8	7.98	8.42	88.97
Huainan	8	5	7.85	8.63	59.98
Huanggang	6	24	7.9	8.65	81.34
Huangshan	109	134	8.38	9.19	596.98
Huangshi	6	8	7.9	8.6	0.44
Ji'an	2	4	7.69	8.49	2.55
Jiaxing	179	111	8.21	9.03	46.95
Jinhua	33	32	8.19	8.99	63.55
Jingmen	2	1	7.69	7.7	7.42
Jingzhou	19	23	8.12	8.59	14.87
Jingdezhen	42	46	8.18	8.9	47.98
Jiujiang	40	54	8.26	8.99	307.2
Kunming	180	211	8.43	9.07	886.46
Leshan	40	29	8.01	8.63	99.47
Lijiang	184	81	8.43	8.99	364.05
Lishui	33	34	8.11	8.83	3.15
Lianyungang	8	8	8.07	8.77	142.99
Liangshan	18	20	8.14	8.66	262.73
Lincang	4	4	7.68	8.59	6
Lu'an	5	5	8.09	8.53	31.46
Liupanshui	17	11	8.21	8.6	61.5
Loudi	0	0	0.79	0.79	0
Luzhou	4	4	7.87	8.64	12.1
Ma'anshan	7	5	7.93	8.45	16.23
Meishan	2	0	8.44	0.79	0
Mianyang	22	15	8.15	8.61	149.76
Nanchang	74	84	8.25	9.14	317.96
Nanchong	10	9	7.97	8.72	37.63
Nanjing	100	286	8.42	9.42	1232.67
Nantong	27	13	8.16	8.83	117.33
Neijiang	3	5	7.61	8.07	1.86
Ningbo	88	73	8.23	9	53.78
Nujiang	4	5	7.68	8.33	0.7
Panzhihua	12	6	7.98	8.64	125.77
Pingxiang	8	6	7.96	8.79	4.23
Pu'er	9	14	7.92	8.87	25.9
Qiandongnan	54	102	8.13	8.95	67.15
Qiannan	46	49	7.98	8.8	9.93
Qianxinan	19	23	7.83	8.89	25.52
Qujing	19	32	8.09	8.58	43.45
Quzhou	22	29	8.15	8.9	20.76
Shanghai	617	551	8.61	9.46	2405.64
Shangrao	88	119	8.31	9.1	204.77
Shaoyang	0	0	0.79	0.79	0
Shaoxing	49	32	8.18	8.82	13.76
Shiyan	13	25	8.1	8.77	97.31
Suzhou	265	210	8.57	9.15	1182.46
Suqian	3	3	7.66	8.15	5.18
Suzhou (Anhui)	2	3	7.61	8.22	9.49
Suizhou	2	6	7.59	8.27	119.51
Suining	0	0	0.79	0.79	0
Taizhou	44	42	8.09	8.88	35.57
Taizhou (Jiangsu)	3	4	7.89	8.33	14.25
Tongling	7	3	7.88	8.53	3.61
Tongren	54	31	8.21	8.9	72.61
Wenzhou	47	52	8.07	9	21.82
Wenshan	23	15	7.92	8.67	33.31
Wuxi	116	62	8.29	8.99	297.07
Wuhu	11	12	8.11	8.88	133.2
Wuhan	177	194	8.45	9.3	1263.75
Xishuangbanna	30	49	8.14	8.95	99.94
Xianning	7	15	7.94	8.6	2.88
Xiangtan	26	28	7.91	8.74	11.75
Xiangxi	88	69	8.33	8.98	243.34
Xiangyang	14	22	7.86	8.87	239.23
Xiaogan	0	0	0.79	0.79	0
Xinyu	0	0	0.79	0.79	0
Xuzhou	19	10	8.11	8.95	433.29
Xuancheng	46	47	8.19	8.99	27.87
Ya'an	12	5	7.94	8.63	38.13
Yancheng	3	2	7.64	8.46	4.93
Yangzhou	33	42	8.19	8.96	106.45
Yibin	8	7	8.03	8.67	24.27
Yichang	56	94	8.19	8.96	138.92
Yichun	22	20	8.26	8.85	34.75
Yiyang	0	1	0.79	9.06	0
Yingtan	12	12	8.11	8.83	26.66
Yongzhou	15	2	7.93	8.37	48.16
Yuxi	16	20	7.85	8.46	1.64
Yueyang	38	38	8.23	8.74	148.23
Zhangjiajie	70	86	8.32	9	318.19
Changsha	128	110	8.33	9.12	472.72
Zhaotong	5	2	7.82	8.42	4.47
Zhenjiang	42	15	8.19	8.82	2.65
Chongqing	307	177	8.48	9.35	1796.12
Zhoushan	78	39	8.13	8.85	3.76
Zhuzhou	7	5	8.02	8.77	6.29
Ziyang	0	0	0.79	0.79	0
Zigong	3	0	8.47	0.79	0
Zunyi	22	18	8.17	8.64	156.59
