# Supplementary material for: Network Structure and Influencing Factors of Tourist Flow in the Yangtze River Economic Belt: A Study Based on Travelogues
Source: Research Square preprint supplement (doi:10.21203/rs.3.rs-6315958/v1), 2025-06-16
Supplement: Supplementary file 3 [file 47966af5792fa5abe197e86c.xlsx]

## Sheet: Sheet1
city	Degree centrality		Close to centrality		Intermediary centrality
	out	in	out	in
Aba	1791	1608	9.62	18.57	3872.65
Anqing	94	155	9.12	16.85	99.49
Anshun	11	3	8.69	14.01	1.11
Bazhong	44	42	9	16.01	4.13
Bengbu	357	480	9.25	16.53	317.93
Baoshan	81	96	9.06	16.3	323.22
Bijie	97	92	9.06	16.76	175.21
Bozhou	5	9	8.42	15.98	23.85
Changde	56	52	9.11	16.15	202.05
Changzhou	7	9	8.88	16.11	16.05
Chenzhou	19	11	9.09	15.21	38.98
Chengdu	7	5	8.6	14.2	1.03
Chizhou	32	46	8.99	15.7	101.33
Chuzhou	25	25	8.9	15.8	18.32
Chuxiong	263	912	9.31	18.04	1039.58
Dazhou	13	12	8.87	15.63	183.93
Dali	114	240	9.04	17.24	247.54
Dehong	133	26	9.06	16.19	30.69
Deyang	55	47	8.93	16.13	8.23
Diqing	110	174	9.12	17.01	232.94
Ezhou	2	4	8.38	15.47	0.43
Enshi	15	15	8.63	15.38	1.2
Fuzhou	192	183	9.01	16.76	25.04
Fuyang	416	345	9.2	16.47	283.75
Garze (Ganzi)	0	0	0.79	0.79	0
Ganzhou	0	0	0.79	0.79	0
Guang'an	178	237	9.15	16.56	44.3
Guangyuan	17	12	8.93	16.34	12.44
Guiyang	116	143	9.16	16.45	295.26
Hangzhou	22	6	8.89	14.37	17.85
Hefei	143	187	9.1	16.38	81.89
Hengyang	25	26	9.04	16.73	16.61
Honghe	42	77	8.99	16.62	15.48
Huzhou	2	5	8.41	15.06	3.52
Huaihua	10	9	8.94	15.88	2.83
Huaian	38	47	8.98	16.34	62.63
Huaibei	5	1	8.41	13.59	0.25
Huainan	249	86	9.16	16.45	26.39
Huanggang	22	13	8.72	15.88	3.78
Huangshan	22	9	8.99	15.23	8.58
Huangshi	1	0	9.27	0.79	0
Ji'an	147	191	9.09	16.64	76.33
Jiaxing	85	43	9.1	16.45	399.58
Jinhua	32	21	8.98	14.9	30.34
Jingmen	12	6	8.52	14.32	2.25
Jingzhou	39	17	9	15.01	119.32
Jingdezhen	5	5	8.56	14.3	0.2
Jiujiang	49	41	8.94	16.51	42.77
Kunming	200	573	9.21	17.73	1146.64
Leshan	135	189	9.1	16.64	28.31
Lijiang	10	7	8.87	15.7	5.35
Lishui	13	11	8.6	14.42	3.28
Lianyungang	23	21	8.65	15.01	19
Liangshan	3	6	8.85	15.53	0
Lincang	430	131	9.23	16.49	84.88
Lu'an	365	374	9.28	17.17	830.04
Liupanshui	5	3	8.57	14.81	11.33
Loudi	36	19	9.03	15.45	17.4
Luzhou	54	144	9.05	16.49	35.79
Ma'anshan	35	25	8.97	14.97	45.11
Meishan	343	765	9.29	17.61	562.13
Mianyang	21	5	8.75	16.03	6.37
Nanchang	28	21	8.8	15.59	9.45
Nanchong	351	539	9.29	17.96	1487.37
Nanjing	23	22	8.63	14.93	29.55
Nantong	3	1	8.45	14.22	1.46
Neijiang	26	31	9.05	16.36	33.94
Ningbo	20	38	8.9	16.05	2.11
Nujiang	25	2	9.01	14.24	10.57
Panzhihua	5	11	8.72	15.74	33.98
Pingxiang	9	9	8.73	15.32	4.08
Pu'er	21	26	9.03	16.01	5.96
Qiandongnan	71	164	9.02	16.67	28.39
Qiannan	95	104	9.07	16.67	13.77
Qianxinan	39	45	8.68	16.21	14.71
Qujing	121	186	9.12	16.49	105.33
Quzhou	9	10	8.64	15.9	39.02
Shanghai	20	24	8.58	14.92	4.83
Shangrao	67	101	8.99	16.28	19.45
Shaoyang	9	5	8.42	15.15	0
Shaoxing	8	37	8.67	16.09	2.06
Shiyan	21	0	9.78	0.79	0
Suzhou	36	36	8.88	15.13	42.58
Suqian	84	93	9.02	16.34	11.89
Suzhou (Anhui)	46	18	9.03	15.74	145.79
Suizhou	5	1	8.53	15.13	0
Suining	93	125	9.04	16.4	9.16
Taizhou	11	12	8.88	16.07	9.28
Taizhou (Jiangsu)	1360	479	9.56	17.15	1081.61
Tongling	53	23	8.99	15.38	14.9
Tongren	3	1	8.6	12.56	1.17
Wenzhou	17	103	8.93	16.43	5.08
Wenshan	2	2	8.33	15.84	2.56
Wuxi	20	31	8.72	15.59	5.6
Wuhu	33	36	8.99	16.23	10.04
Wuhan	27	50	8.94	16.4	310.86
Xishuangbanna	90	119	9.11	16.47	98.56
Xianning	220	310	9.18	17.27	406.42
Xiangtan	2	0	9.27	0.79	0
Xiangxi	5	15	8.54	16.45	12.15
Xiangyang	0	0	0.79	0.79	0
Xiaogan	15	35	8.96	16.07	13.71
Xinyu	141	135	9.15	15.96	54.68
Xuzhou	0	0	0.79	0.79	0
Xuancheng	56	28	9.04	15.76	44.4
Ya'an	5	0	9.36	0.79	0
Yancheng	2	7	8.32	15.49	3.18
Yangzhou	5	0	9.36	0.79	0
Yibin	1499	445	9.55	17.68	2130.71
Yichang	47	60	8.99	16.53	28.89
Yichun	82	45	9.03	16.09	25.02
Yiyang	8	6	8.62	15.9	0.09
Yingtan	218	53	9.22	16.23	13.91
Yongzhou	208	368	9.12	17.31	603.52
Yuxi	13	10	8.88	15.92	12.57
Yueyang	57	72	9.06	16.28	15.9
Zhangjiajie	6	6	8.64	14.25	122.99
Changsha	29	9	9.01	15.3	37.62
Zhaotong	9	10	8.89	15.84	12.91
Zhenjiang	28	16	8.94	16.23	13.34
Chongqing	10	14	8.67	15.49	48.76
Zhoushan	143	286	9.16	17.24	272.41
Zhuzhou	17	8	8.61	15.38	0.17
Ziyang	133	183	9.07	16.4	51.14
Zigong	83	91	8.85	16.17	5.54
Zunyi	23	25	8.97	15.63	23.97
