# Supplementary material for: Network Structure and Influencing Factors of Tourist Flow in the Yangtze River Economic Belt: A Study Based on Travelogues
Source: Research Square preprint supplement (doi:10.21203/rs.3.rs-6315958/v1), 2025-06-16
Supplement: Supplementary file 4 [file 489eabcaf4dda4d75d223d0f.xlsx]

## Sheet: Sheet1
	Core Area	Marginal Zone
Core Area	27.533	1.237
Marginal Zone	1.24	0.184
