# Supplementary material for: Network Structure and Influencing Factors of Tourist Flow in the Yangtze River Economic Belt: A Study Based on Travelogues
Source: Research Square preprint supplement (doi:10.21203/rs.3.rs-6315958/v1), 2025-06-16
Supplement: Supplementary file 7 [file 73aa14e1ef558e0b794e7df0.xlsx]

## Sheet: Sheet1
	Core Area	Marginal Zone
Core Area	44.304	3.916
Marginal Zone	3.342	0.25
