# Supplementary material for: Network Structure and Influencing Factors of Tourist Flow in the Yangtze River Economic Belt: A Study Based on Travelogues
Source: Research Square preprint supplement (doi:10.21203/rs.3.rs-6315958/v1), 2025-06-16
Supplement: Supplementary file 8 [file 7c92bf140b0ee025272230d2.xlsx]

## Sheet: Sheet1
	Core Area	Marginal Zone
Core Area	44.8	2.674
Marginal Zone	2.458	0.22
