# Supplementary material for: Network Structure and Influencing Factors of Tourist Flow in the Yangtze River Economic Belt: A Study Based on Travelogues
Source: Research Square preprint supplement (doi:10.21203/rs.3.rs-6315958/v1), 2025-06-16
Supplement: Supplementary file 9 [file 7f09e1d0a62842bd103b5994.xlsx]

## Sheet: Sheet1
city	Y2019Core Area(0)Marginal Zone(1)
Aba	0
Anqing	0
Anshun	1
Bazhong	0
Bengbu	0
Baoshan	0
Bijie	0
Bozhou	0
Changde	0
Changzhou	1
Chenzhou	0
Chengdu	1
Chizhou	0
Chuzhou	0
Chuxiong	0
Dazhou	0
Dali	1
Dehong	0
Deyang	0
Diqing	0
Ezhou	0
Enshi	1
Fuzhou	0
Fuyang	0
Garze (Ganzi)	0
Ganzhou	0
Guang'an	0
Guangyuan	0
Guiyang	1
Hangzhou	1
Hefei	1
Hengyang	0
Honghe	0
Huzhou	1
Huaihua	0
Huaian	0
Huaibei	0
Huainan	0
Huanggang	0
Huangshan	1
Huangshi	0
Ji'an	0
Jiaxing	1
Jinhua	1
Jingmen	0
Jingzhou	0
Jingdezhen	1
Jiujiang	1
Kunming	1
Leshan	1
Lijiang	1
Lishui	1
Lianyungang	0
Liangshan	0
Lincang	0
Lu'an	0
Liupanshui	0
Loudi	0
Luzhou	0
Ma'anshan	0
Meishan	1
Mianyang	0
Nanchang	1
Nanchong	0
Nanjing	1
Nantong	1
Neijiang	0
Ningbo	1
Nujiang	0
Panzhihua	0
Pingxiang	0
Pu'er	1
Qiandongnan	1
Qiannan	0
Qianxinan	0
Qujing	0
Quzhou	0
Shanghai	1
Shangrao	1
Shaoyang	0
Shaoxing	1
Shiyan	0
Suzhou	1
Suqian	0
Suzhou (Anhui)	0
Suizhou	0
Suining	0
Taizhou	1
Taizhou (Jiangsu)	1
Tongling	0
Tongren	0
Wenzhou	1
Wenshan	0
Wuxi	1
Wuhu	0
Wuhan	1
Xishuangbanna	1
Xianning	0
Xiangtan	1
Xiangxi	1
Xiangyang	1
Xiaogan	0
Xinyu	0
Xuzhou	0
Xuancheng	1
Ya'an	0
Yancheng	1
Yangzhou	1
Yibin	0
Yichang	1
Yichun	0
Yiyang	0
Yingtan	0
Yongzhou	0
Yuxi	0
Yueyang	0
Zhangjiajie	1
Changsha	1
Zhaotong	0
Zhenjiang	1
Chongqing	1
Zhoushan	0
Zhuzhou	1
Ziyang	1
Zigong	0
Zunyi	1
