# Supplementary material for: Network Structure and Influencing Factors of Tourist Flow in the Yangtze River Economic Belt: A Study Based on Travelogues
Source: Research Square preprint supplement (doi:10.21203/rs.3.rs-6315958/v1), 2025-06-16
Supplement: Supplementary file 10 [file f76d2dc8c590fd4f2ff128bb.xlsx]

## Sheet: Sheet1
city	Degree centrality		Close to centrality		Intermediary centrality
	out	in	out	in
Aba	974	911	7.99	8.69	3334.11
Anqing	98	113	7.71	8.28	201.15
Anshun	6	5	7.2	7.88	10.03
Bazhong	33	33	7.54	8.12	3.17
Bengbu	244	195	7.78	8.27	344.91
Baoshan	49	43	7.45	8.05	175.61
Bijie	47	54	7.63	8.25	196.99
Bozhou	5	7	7.12	7.67	172.45
Changde	39	25	7.67	7.83	130.94
Changzhou	10	7	7.51	8.13	29.16
Chenzhou	27	11	7.64	7.91	73.43
Chengdu	3	5	7.12	7.57	1.28
Chizhou	21	33	7.53	8.09	191.5
Chuzhou	16	25	7.52	8.07	79.08
Chuxiong	100	405	7.77	8.61	1016.5
Dazhou	10	7	7.42	7.89	162.51
Dali	74	110	7.65	8.38	275.69
Dehong	41	11	7.52	8.15	71.51
Deyang	44	44	7.53	8.15	12.06
Diqing	66	108	7.71	8.43	728.31
Ezhou	2	4	7.15	8	1.85
Enshi	7	15	7.34	7.92	2.79
Fuzhou	179	125	7.61	8.3	35.76
Fuyang	222	181	7.73	8.28	481.38
Garze (Ganzi)	0	0	0.79	0.79	0
Ganzhou	0	0	0.79	0.79	0
Guang'an	88	98	7.65	8.26	40.9
Guangyuan	12	11	7.55	8.18	21.72
Guiyang	100	82	7.7	8.16	302.5
Hangzhou	8	6	7.47	7.68	21.74
Hefei	76	170	7.64	8.23	140.01
Hengyang	23	26	7.65	8.27	42.63
Honghe	46	65	7.6	8.25	23.5
Huzhou	2	2	7.12	7.39	2.5
Huaihua	3	8	7.14	8.07	2.32
Huaian	46	41	7.59	8.19	100.84
Huaibei	5	1	7.12	7.36	0.25
Huainan	166	47	7.68	8.19	18.76
Huanggang	8	7	7.32	7.78	2.79
Huangshan	12	10	7.42	8.15	38.83
Huangshi	0	0	0.79	0.79	0
Ji'an	113	120	7.66	8.25	140.81
Jiaxing	21	26	7.57	8.24	502.01
Jinhua	20	15	7.37	7.79	16.06
Jingmen	6	6	7.25	7.56	2.98
Jingzhou	26	17	7.59	7.86	115.34
Jingdezhen	3	2	7.16	7.71	0.2
Jiujiang	36	36	7.47	8.27	64.73
Kunming	149	304	7.74	8.49	1204.1
Leshan	34	83	7.6	8.28	44.2
Lijiang	8	7	7.49	8.06	9.51
Lishui	9	12	7.1	8.11	34.02
Lianyungang	17	21	7.38	7.85	35.33
Liangshan	0	0	0.79	0.79	0
Lincang	256	81	7.73	8.26	93.3
Lu'an	199	201	7.81	8.33	856.8
Liupanshui	5	3	7.28	7.77	12.36
Loudi	5	18	7.36	8.2	15.51
Luzhou	52	54	7.58	8.24	47.71
Ma'anshan	26	25	7.5	7.82	35.79
Meishan	251	538	7.83	8.5	729.99
Mianyang	7	4	7.44	7.85	7.87
Nanchang	20	12	7.35	7.82	2.74
Nanchong	201	260	7.78	8.51	985.1
Nanjing	23	25	7.31	8.09	118.96
Nantong	1	3	6.7	7.9	24.66
Neijiang	27	26	7.59	8.2	57.51
Ningbo	5	14	7.49	8.06	1.9
Nujiang	3	2	7.28	7.66	1.88
Panzhihua	4	7	7.39	7.39	70.19
Pingxiang	8	5	7.3	7.96	41.96
Pu'er	4	15	7.43	8.13	48.24
Qiandongnan	57	72	7.5	8.26	21.6
Qiannan	71	65	7.61	8.26	9.8
Qianxinan	26	28	7.3	7.9	7.01
Qujing	92	115	7.68	8.24	148.83
Quzhou	9	7	7.34	7.86	233.71
Shanghai	16	24	7.31	7.8	11.07
Shangrao	31	34	7.47	8.23	52.92
Shaoyang	0	0	0.79	0.79	0
Shaoxing	3	3	7.08	7.84	2.68
Shiyan	2	4	7.23	8.09	0
Suzhou	31	22	7.41	7.9	50.66
Suqian	60	63	7.6	8.12	13.65
Suzhou (Anhui)	20	18	7.56	8.06	186.14
Suizhou	3	0	7.81	0.79	0
Suining	78	78	7.56	8.13	4.2
Taizhou	11	16	7.51	8.16	105.4
Taizhou (Jiangsu)	588	293	7.93	8.42	1289.31
Tongling	19	23	7.52	7.92	15.84
Tongren	2	1	7.16	7.15	5.23
Wenzhou	8	23	7.37	8.15	3.76
Wenshan	2	1	7	7.57	7.51
Wuxi	12	18	7.41	8.03	15.2
Wuhu	22	33	7.58	8.18	16.66
Wuhan	14	25	7.31	8.14	227.5
Xishuangbanna	39	73	7.61	8.29	128.7
Xianning	106	154	7.69	8.36	256.19
Xiangtan	0	0	0.79	0.79	0
Xiangxi	5	9	7.3	8.2	15.71
Xiangyang	0	0	0.79	0.79	0
Xiaogan	8	17	7.5	8.09	49.19
Xinyu	75	55	7.65	8.05	139.43
Xuzhou	0	0	0.79	0.79	0
Xuancheng	22	18	7.6	7.95	164.26
Ya'an	0	0	0.79	0.79	0
Yancheng	2	3	7.11	7.75	0
Yangzhou	0	0	0.79	0.79	0
Yibin	602	237	7.89	8.54	1687.37
Yichang	33	48	7.6	8.25	43.47
Yichun	53	32	7.61	8.17	41.51
Yiyang	7	2	7.31	7.84	0.17
Yingtan	104	24	7.6	8.13	2.58
Yongzhou	155	130	7.71	8.33	458.29
Yuxi	3	5	7.13	8.11	208.59
Yueyang	29	25	7.32	8.13	22.78
Zhangjiajie	2	6	7.12	7.64	118.69
Changsha	17	10	7.41	8.04	54.49
Zhaotong	7	10	7.34	8.09	9.62
Zhenjiang	12	14	7.55	8.18	38.24
Chongqing	6	14	7.32	7.96	70.67
Zhoushan	117	152	7.74	8.42	471.87
Zhuzhou	6	8	7.32	7.92	0.28
Ziyang	73	102	7.55	8.23	57.41
Zigong	70	63	7.42	8.18	11.67
Zunyi	21	32	7.3	8.03	19.91
